# Supplementary material
Source: Springer Nature journal article supplement (https://www.springermedizin.de/resource/supplementary/12985_2012_2126_MOESM3_ESM.pdf/9606092)

A

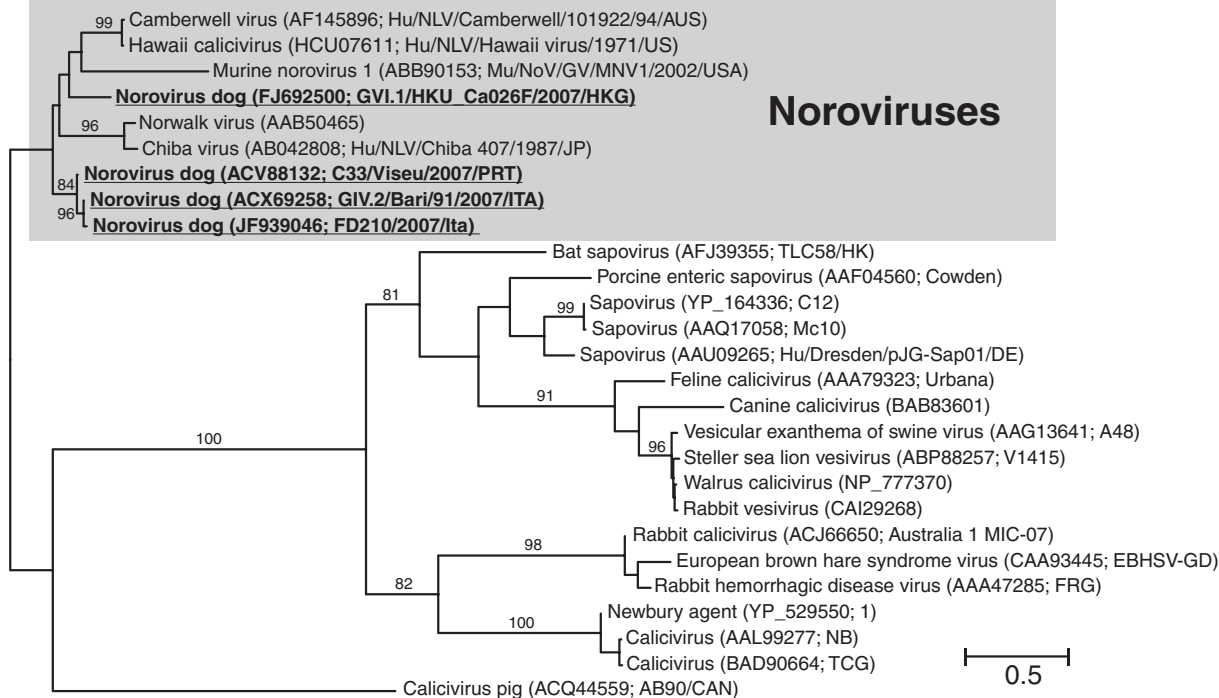

B

ACX69258

JF939046

ACV88132

FJ692500\*

FJ692500\*

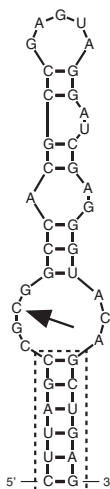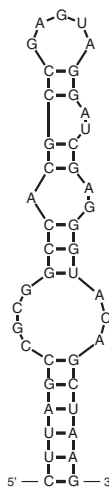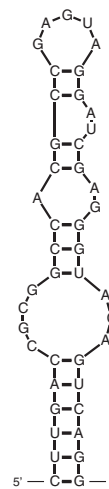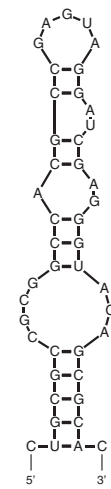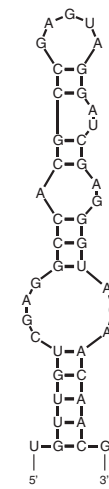

Supplement: MOESM3 [file 9606092]
